# Supplementary material for: Reduced graphene oxide promoted assembly of graphene@polyimide film as a flexible cathode for high-performance lithium-ion battery
Source: Royal Society of Chemistry journal article supplement (doi:10.1039/d0ra00884b), 2020-01-01
Supplement: d0ra00884b1.pdf [file d0ra00884b1.pdf]

## Electronic Supplementary Information

### Reduced Graphene Oxide Promoted Assembly of Graphene@Polyimide Film as Flexible Cathode for High-performance Lithium-Ion Battery

Bin Chang<sup>a</sup>, Jian Ma<sup>a</sup>, Tiancai Jiang<sup>b</sup>, Li Gao<sup>a</sup>, Yuanting Li<sup>a</sup>, Mingan Zhou,<sup>a</sup>

Yanshan Huang<sup>a\*</sup>, and Sheng Han<sup>a\*</sup>

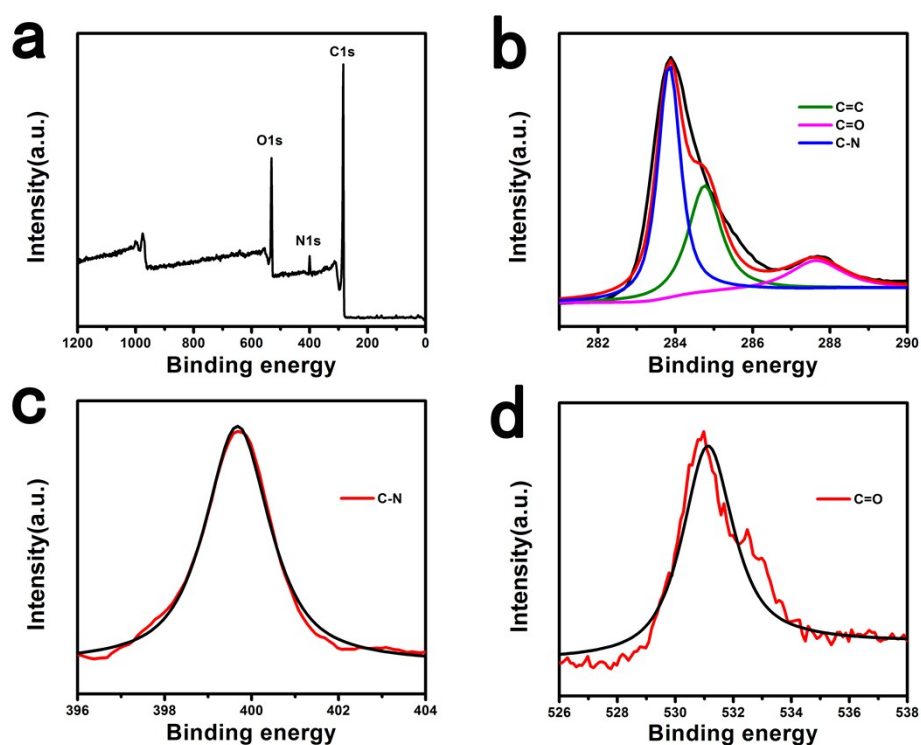

**Fig. S1.** (a) XPS spectrum of GF-PI and the corresponding high-resolution; (b) C1s; (c) N1s and (d) O1s peaks.

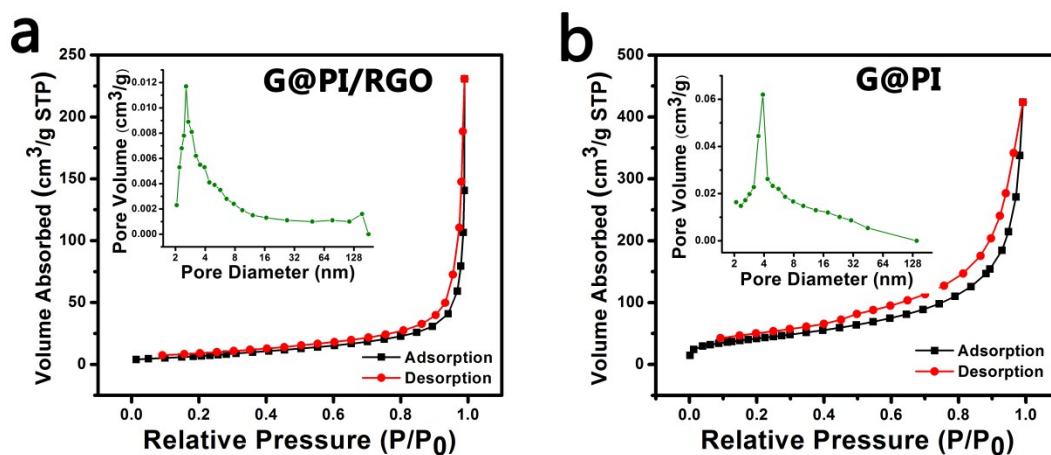

**Fig. S2.** (a). Nitrogen adsorption-desorption isotherms and the corresponding pore size distribution for G@PI/RGO. (b). Nitrogen adsorption-desorption isotherms and the corresponding pore size distribution for G@PI.

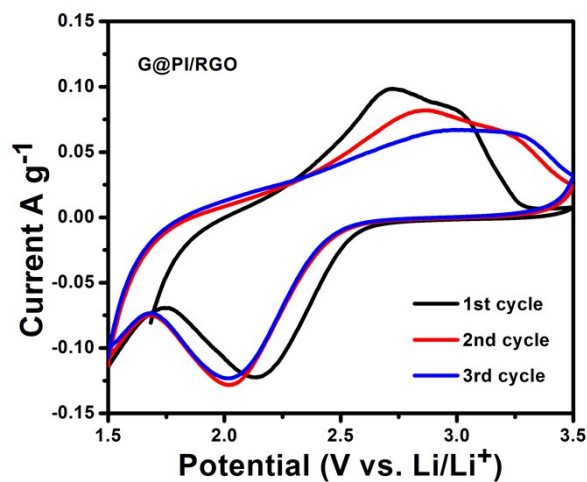

**Fig. S3.** The CV curves of G@PI/RGO at a scan rate of  $0.1 \text{ mV s}^{-1}$  during the 1st, 2nd, and 3rd cycles.

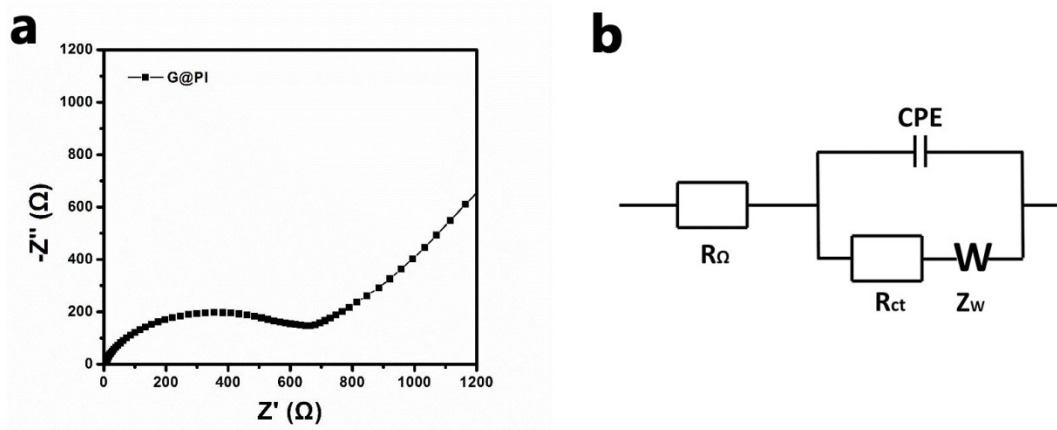

**Fig. S4.** (a). Nyquist plots for the G@PI electrode before the cycling test. (b). Equivalent circuit for G@PI and G@PI/RGO electrodes.

**Table S1.** The resistance of G@PI and G@PI/RGO electrodes

| Samples               | $R\Omega$ ( $\Omega$ ) | $R_{ct}$ ( $\Omega$ ) |
|-----------------------|------------------------|-----------------------|
| G@PI                  | 9.718                  | 458.7                 |
| G@PI/RGO              | 6.866                  | 173.2                 |
| G@PI/RGO after cycles | 2.881                  | 45.95                 |

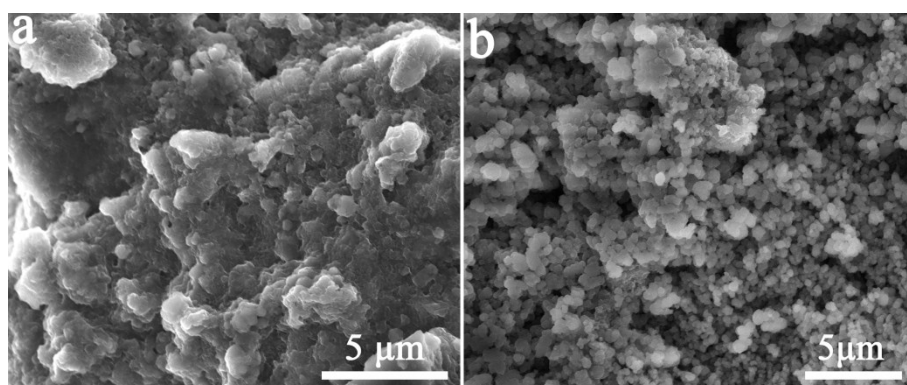

**Fig. S5.** (a) SEM image of G@PI/RGO after 300 cycles; (b) SEM image of G@PI after 300 cycles.

**Table S2.** Electrochemical performance of typical PI-based cathode materials for LIB

| Materials             | Structures | Capacity<br>(mAh g <sup>-1</sup> )<br>Current density<br>(mA g <sup>-1</sup> ) | High current<br>density<br>Current<br>density (mA g <sup>-1</sup> ) | Capacity<br>Retention<br>(Cycles)              | Ref                                             |
|-----------------------|------------|--------------------------------------------------------------------------------|---------------------------------------------------------------------|------------------------------------------------|-------------------------------------------------|
| GF/PI<br>(NTCDA/EDA)  |            | 213<br>(50)                                                                    | 102<br>(4000)                                                       | 81%<br>(1000 mA g <sup>-1</sup><br>600 Cycles) | J. Mater.<br>Chem. A,<br>2017, 5,<br>2710       |
| PI-FLEG<br>(PMDA/EDA) |            | 177<br>(44.3)<br>1C=443 mA g <sup>-1</sup> )                                   | 38<br>(2218)                                                        | 80%<br>(222 mA g <sup>-1</sup><br>2000 Cycles) | RSC Adv.,<br>2016, 6,<br>33287                  |
| PI-COF/RGO            |            | 112<br>(128)                                                                   | 15<br>(1420)                                                        | 100%<br>(67 mA g <sup>-1</sup><br>300 Cycles)  | Nanoscale,<br>2019,11,<br>5330-5335             |
| PTCDA/GF              |            | 173<br>(50)                                                                    | 64<br>(2000)                                                        | 92%<br>(100 mA g <sup>-1</sup><br>500 Cycles)  | ACS Sus.<br>Chem. Eng.<br>2018, 6,<br>8392-8399 |
| PDHBQS-<br>SWCNTs     |            | 182<br>(50)                                                                    | 75<br>(5000)                                                        | 124.5<br>100 mA g <sup>-1</sup><br>500 Cycles) | Adv.<br>Mater.<br>2018, 30,<br>1703868          |

|                             |                                                                                   |                                             |                |                                                                                                   |                                               |
|-----------------------------|-----------------------------------------------------------------------------------|---------------------------------------------|----------------|---------------------------------------------------------------------------------------------------|-----------------------------------------------|
| PI / CB<br>(PMDA)           | 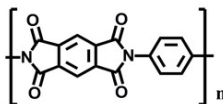 | 182<br>(100)                                | 116<br>(1000)  | 81%<br>(300 mA g <sup>-1</sup><br>200 Cycles)                                                     | Elec. acta.<br>2017.12.07<br>5                |
| PMAQ-<br>SWNT<br>(PMDA)     |  | 164<br>(200)                                | 120<br>(4000)  | 91.3<br>(300 mA g <sup>-1</sup><br>300 Cycles)                                                    | J. Mater.<br>Chem. A,<br>2016,4,<br>2115-2121 |
| 3D-RGO/PI<br>(PMDA)         |  | 175<br>(44.3<br>1C=443 mA g <sup>-1</sup> ) | 101<br>(886)   | 82%<br>(221 mA g <sup>-1</sup><br>300 Cycles)                                                     | J. Mater.<br>Chem. A,<br>2014, 2,<br>10842    |
| G@PI/RGO<br>(NTCDA/ED<br>A) |  | 198<br>(30)                                 | 86.1<br>(8000) | 93%<br>(1000 mA g <sup>-1</sup><br>300 Cycles)<br>74%<br>(1000 mA g <sup>-1</sup><br>2000 Cycles) | This work                                     |
